# Supplementary material
Source: PubMed Central journal article supplement (PMC4993031)
Supplement: cddiscovery20158-s1.pdf [file cddiscovery20158-s1.pdf]

# Supplementary Figure 1

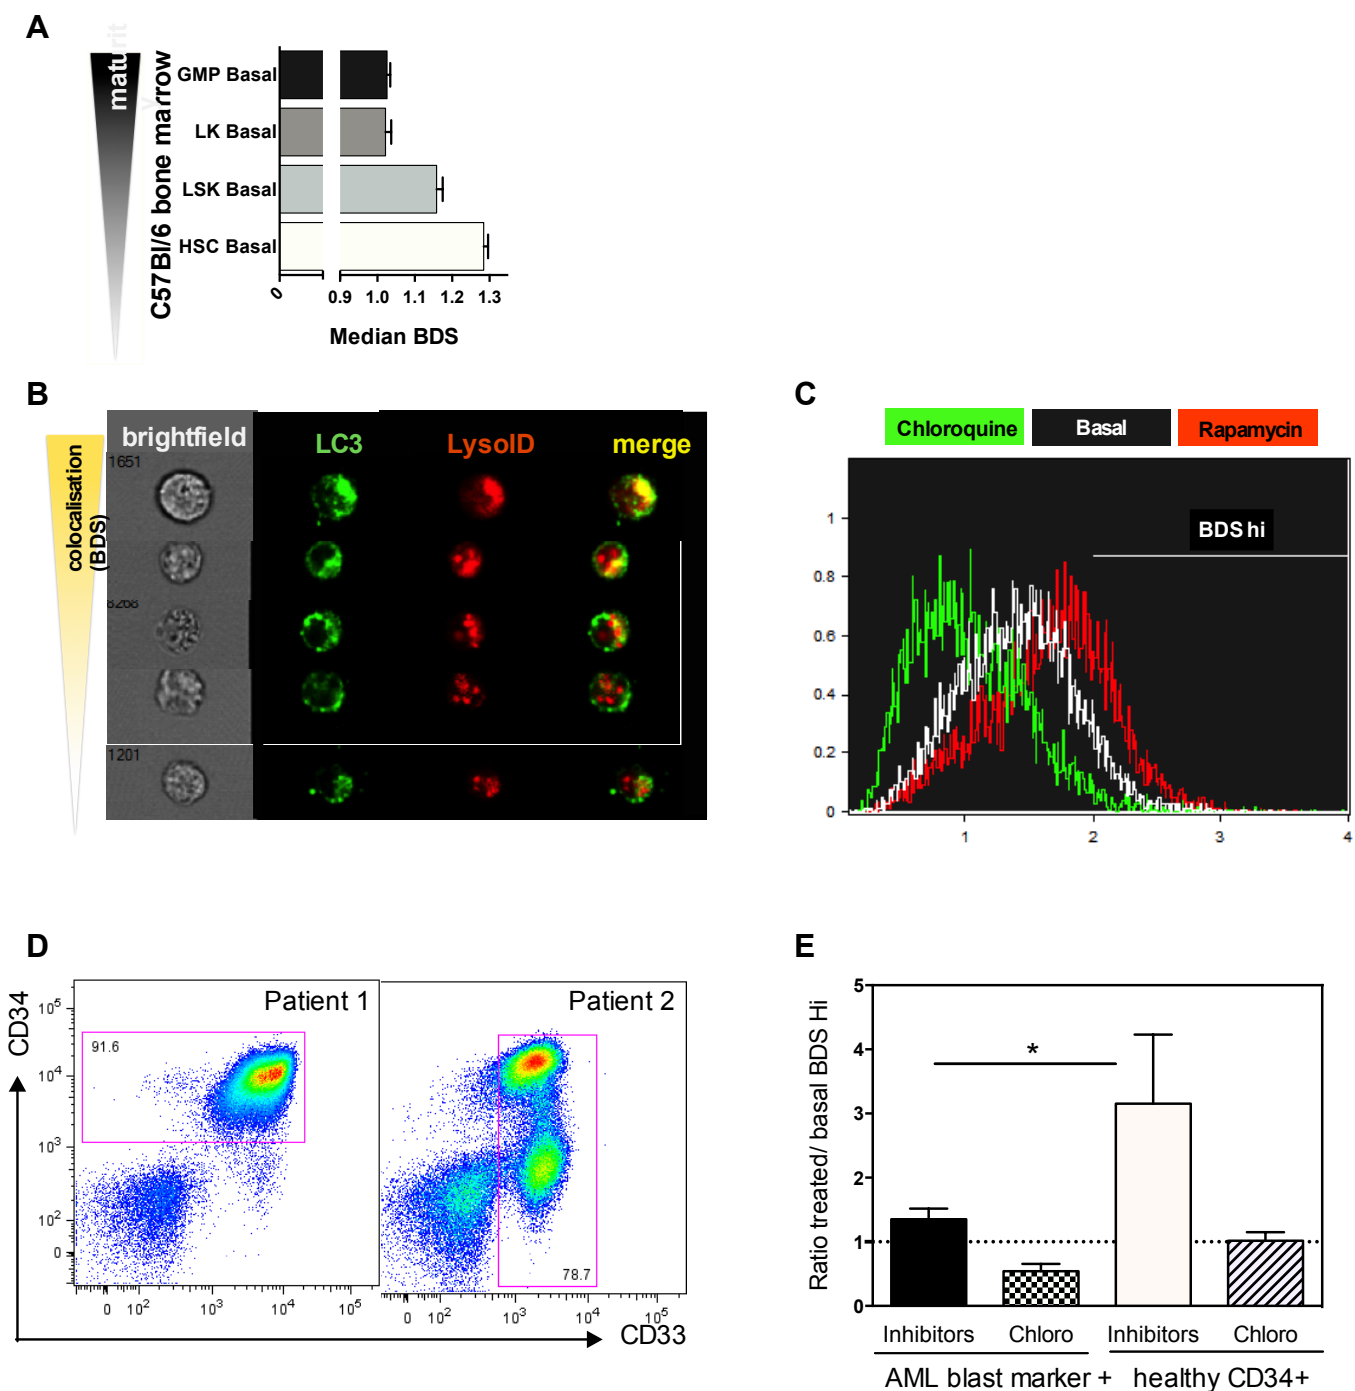

**Figure S1 (A)** Median LC3/LysolD BDS of murine HSC (Lin-Sca1+cKit+CD150+CD48-), LSK (Lin-Sca1+cKit+), LK myeloid progenitors (Lin-Sca1-cKit+) and GMP (Granulocyte-macrophage progenitor, Lin-Sca1-cKit+FcgRII/IIIhi) bone marrow populations (note that median BDS is employed rather than %BDS<sub>hi</sub> due to HSC population rarity) (150,000 cells analysed per sample, n=3 mice, t-test p<0.05) **(B)** Representative images of cells from Image Stream Flow Cytometry (10,000 cells analyzed per sample) sorted for increasing colocalization of LC3 and lysosomes (LysolD) **(C)** Representative histograms of autophagy quantification by LC3 and LysolD colocalization (Bright Detail Similarity, BDS) of 10,000 cells cultured in normal medium (basal) and with treatment indicated (Chloroquine, autophagy inhibitor; Rapamycin, autophagy inducer) **(D)** Acute myeloid leukemia patient immunophenotyping and blast marker gating, example dot plots for CD33/CD34 expression of bone marrow mononuclear cells from acute myeloid leukemia patients, showing donors where CD34 (left) or CD33 (right) best defines the blast population. The single or two-marker combination that represents the highest proportion of the blast population was chosen after evaluation of 5 blast markers and used for Image Stream and Fluidigm analysis **(E)** Ratio of cells treated with E64D/Peptsatin A or Chloroquine over untreated cells, gated on BDS<sub>hi</sub> and CD33+ or CD34+ or CD13+ or a combination from AML donors, or CD34+ from healthy donors, t-test, p<0.05.
