# Supplementary material
Source: PubMed Central journal article supplement (PMC4993031)
Supplement: cddiscovery20158-s2.pdf [file cddiscovery20158-s2.pdf]

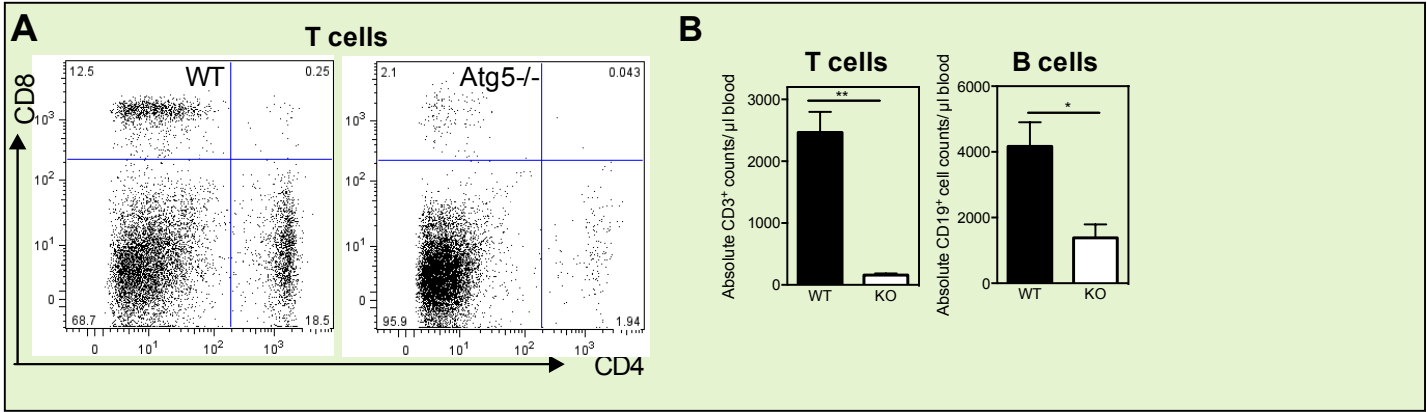

## erythrocytes

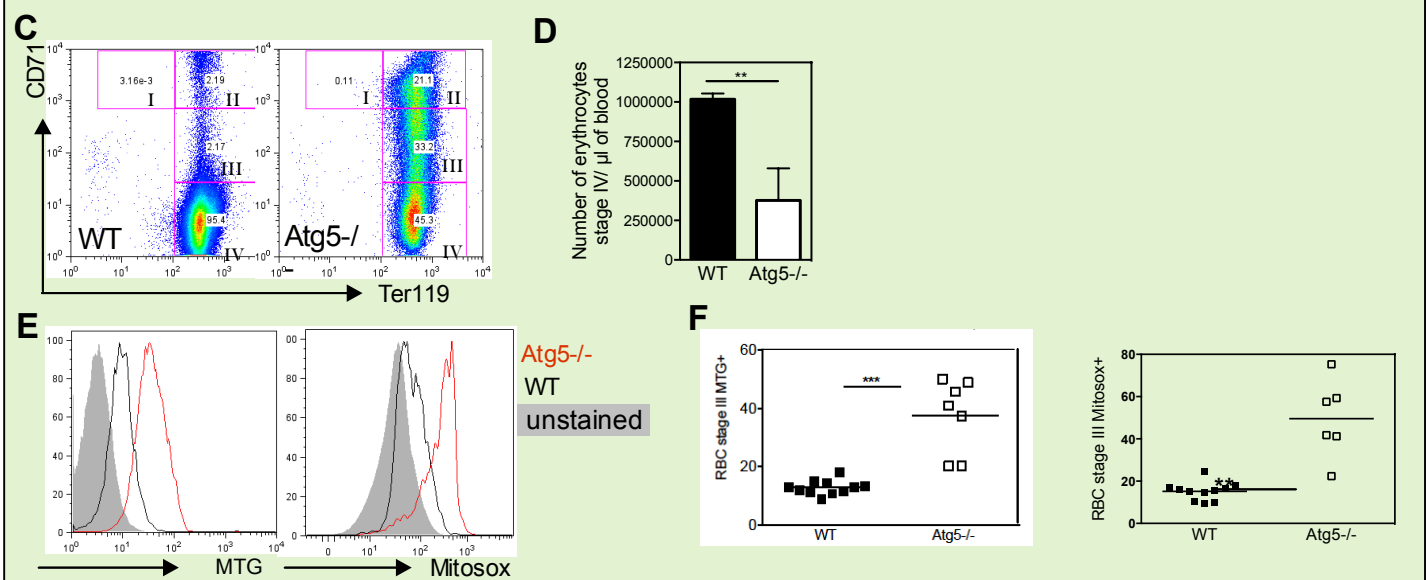

## HSPCs

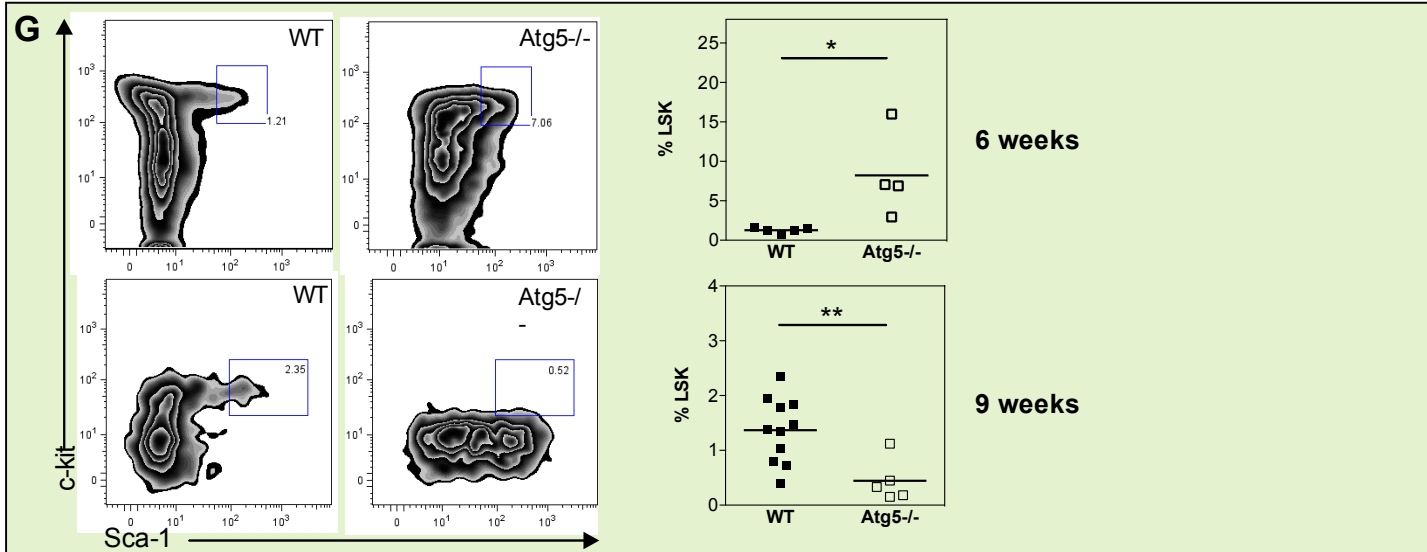

**Figure S2 VavAtg5<sup>-/-</sup> lymphoid and erythroid cells are decreased in number** (A) Representative CD4/CD8 FACS plots of VavAtg5<sup>-/-</sup> and WT littermate spleen at 6 weeks of age (B) Absolute blood counts of CD3<sup>+</sup> T cells and CD19<sup>+</sup> B cells in VavAtg5<sup>-/-</sup> and WT mice. (C) Representative FACS plots of VavAtg5<sup>-/-</sup> and WT blood at 6 weeks of age showing CD71/Ter119 defined erythroid development stages I-IV. (D) Absolute count in 9 week old VavAtg5<sup>-/-</sup> and WT mice of stage IV erythroid cells in blood. (E) MitoTracker Green (MTG) intensity in stage III erythroid cells, with representative overlaid histograms for each genotype (top) and frequency of MTG positive cells (bottom). (F) Mitochondrial ROS (MitoSOX intensity) in stage III VavAtg5<sup>-/-</sup> and WT erythroid cells, with representative overlaid histograms for each genotype (top right) and frequency of MitoSOX positive cells (bottom right). (G) Frequency of LSK cells in BM from VavAtg5<sup>-/-</sup> or WT mice at 6 weeks of age (top) or 9 weeks of age (bottom). All bar graph values are mean ± s.e.m., statistics are from Mann Whitney tests; p < 0.05
