# Supplementary material
Source: PubMed Central journal article supplement (PMC4993031)
Supplement: cddiscovery20158-s4.pdf [file cddiscovery20158-s4.pdf]

## Supplementary Figure 4

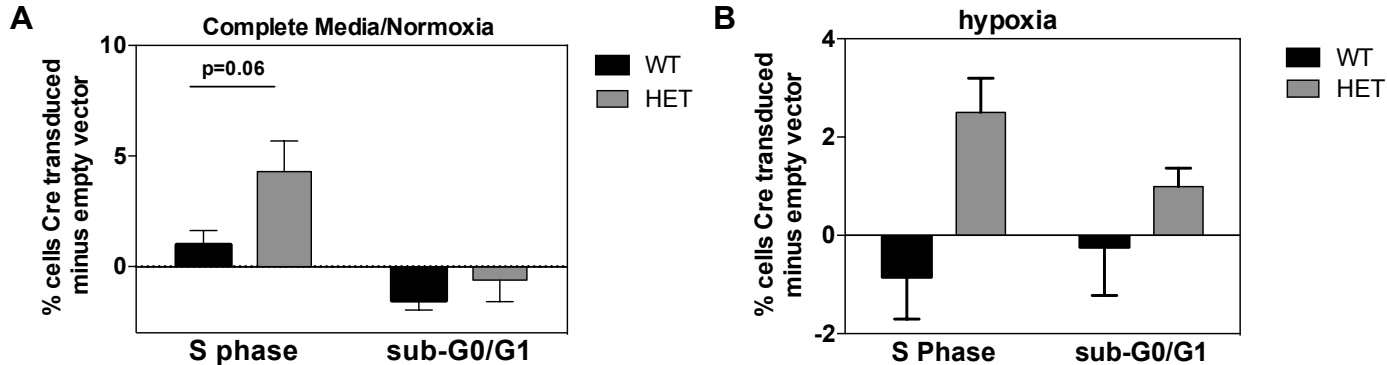

**Figure S4 HET MLL-ENL display increased cell proliferation and apoptosis.** Differences in frequency of cells in S phase or sub-G0/G1 (dead) and BrdU pulse (Empty vector subtracted from Cre transduced for each relevant genotype) (**A**) after culture in complete media (10% FCS and cytokines) and normoxia for 40 hrs or (**B**) after 40 hrs in 0.1% oxygen; error bars represent SEM (n=5), unpaired t-test.
